# Supplementary material for: Nepal Ambient Monitoring and Source Testing Experiment (NAMaSTE): emissions of particulate matter from wood- and dung-fueled cooking fires, garbage and crop residue burning, brick kilns, and other sources
Source: Copernicus journal article supplement (doi:10.5194/acp-18-2259-2018), 2018-02-15
Supplement: Supplementary file 1 [file acp-18-2259-2018-supplement.zip]

Archive with 2 entries (2 files):
- acp-18-2259-2018-supplement-title-page.pdf
- Tables_S1-S3.xlsx
