# Supplementary material for: Nepal Ambient Monitoring and Source Testing Experiment (NAMaSTE): emissions of particulate matter from wood- and dung-fueled cooking fires, garbage and crop residue burning, brick kilns, and other sources
Source: Copernicus journal article supplement (doi:10.5194/acp-18-2259-2018), 2018-02-15
Supplement: Supplementary file 1 [file acp-18-2259-2018-supplement.zip › acp-18-2259-2018-supplement-title-page.pdf]

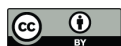

## *Supplement of*

# **Nepal Ambient Monitoring and Source Testing Experiment (NAMaSTE): emissions of particulate matter from wood- and dung-fueled cooking fires, garbage and crop residue burning, brick kilns, and other sources**

**Thilina Jayarathne et al.**

*Correspondence to:* Elizabeth A. Stone ([betsy-stone@uiowa.edu](mailto:betsy-stone@uiowa.edu))

- [acp-18-2259-2018-supplement-title-page.pdf](#)
- [Tables\\_S1-S3.xlsx](#)

The copyright of individual parts of the supplement might differ from the CC BY 3.0 License.
