# Supplementary material for: Nepal Ambient Monitoring and Source Testing Experiment (NAMaSTE): emissions of particulate matter from wood- and dung-fueled cooking fires, garbage and crop residue burning, brick kilns, and other sources
Source: Copernicus journal article supplement (doi:10.5194/acp-18-2259-2018), 2018-02-15
Supplement: Supplementary file 1 [file acp-18-2259-2018-supplement.zip › Tables_S1-S3.xlsx]

## Sheet: Table S1
Table S1: Summary of filter samples analyzed in this study, by fire number, source category, emission source type, fuel, duration of sample collection, PM2.5 mass concentrations in sampled smoke plumes (with uncertainty), and location of sample collection.
Source Category	Emission Source (notes)	Fuel (notes)	Fire #	Location of Sample Collection	Duration of sampling (min:sec)	PM mass (µg m-3)	PM mass uncertainty (µg m-3)
GenSet	Diesel Generator (5 kVA)	diesel	1	Kathmandu	00:32:24	796.186	52.9834
GenSet	Petrol Generator (4 kVA)	petrol	2	Kathmandu	00:39:21	45.3114	41.1998
Motorcycles	Motorcycles - before servicing	petrol	3	Kathmandu	00:48:33	2036.29	41.6752
Motorcycles	Motorcycles - after servicing1	petrol	8	Kathmandu	00:47:52	217.577	32.4652
Garbage burning	Mixed waste (damp conditions)	paper, plastic bags and kitchen waste	14a	Kathmandu	00:08:25	82643.4	8361.63
Garbage burning	Mixed waste (damp conditions)	paper, plastic bags and kitchen waste	14b	Kathmandu	00:15:57	19510.7	591.22
Garbage burning	Foil wrappers (damp conditions)	Al foil-lined chip bags, chip bags, candy wrappers	15	Kathmandu	00:09:37	16651.2	1575.54
Garbage burning	Plastic waste (damp conditions)	polyethylene bags, plastic cups	16	Kathmandu	00:03:43	19270.4	489.819
Cooking fire	1-pot traditional mud stove	hardwood (ignited with kerosene)	17	RETS	00:07:35	9072.83	981.07
Cooking fire	1-pot traditional mud stove	hardwood & dung	18	RETS	00:09:43	14592.1	239.365
Cooking fire	1-pot traditional mud stove	dung & twigs	19	RETS	00:09:57	22591.1	335.904
Cooking fire	1-pot traditional mud stove	dung	20	RETS	00:09:44	19716.6	311.732
Cooking fire	Chimney stove	hardwood	21	RETS	00:08:54	5398.47	217.74
Cooking fire	Chimney stove	hardwood & dung	22	RETS	00:10:16	15254.6	251.945
Cooking fire	Chimney stove	dung & twigs	23	RETS	00:09:33	25737.1	387.211
Cooking fire	Rocket stove, natural draught	hardwood	24	RETS	00:09:41	796.841	164.567
Cooking fire	Rocket stove, natural draught	hardwood & dung	25	RETS	00:09:53	8081.74	180.196
Cooking fire	Forced-draught stove	charcoal	26	RETS	00:08:51	959.349	175.142
Cooking fire	Forced-draught stove	hardwood	27	RETS	00:08:48	492.642	173.361
Cooking fire	Forced-draught stove w/ charger	biobriquette (ignition with glowing hardwood)	28	RETS	00:03:25	822.739	497.265
Cooking fire	Forced-draught stove w/ charger	biobriquette (cooking)	29	RETS	00:14:00	329.174	117.741
Cooking fire	Bhuse chulo	sawdust (ignited with hardwood and kerosene)	30	RETS	00:09:45	2384.42	182.147
Cooking fire	Gas burner	biogas	31	RETS	00:09:40	<2.27E+02	NA
Cooking fire	3-Stone traditional cooking fire	hardwood (ignited with kerosene)	32	RETS	00:10:05	6856.15	172.465
Cooking fire	3-Stone traditional cooking fire	twigs	33	RETS	00:09:38	6636.04	180.341
Cooking fire	3-Stone traditional cooking fire	dung	34	RETS	00:10:46	18104.8	237.909
Brick kiln	Induced-draught zig-zag kiln	coal & bagasse (igniter)	35a	Dhading	00:15:08	12151.2	209.382
Brick kiln	Induced-draught zig-zag kiln	coal & bagasse (igniter)	35b	Dhading	00:12:54	15399.2	289.171
Brick kiln	Induced-draught zig-zag kiln	coal & bagasse (igniter)	35c	Dhading	00:38:07	26327.8	899.644
Brick kiln	Clamp kiln	coal (sawdust and wood for ignition)	36a	Panchkhal	00:23:48	2739.54	69.2627
Brick kiln	Clamp kiln	coal (sawdust and wood for ignition)	36b	Panchkhal	00:09:08	1576.62	166.129
Brick kiln	Clamp kiln	coal (sawdust and wood for ignition)	36c	Panchkhal	00:16:34	1251.07	100.14
Cooking fire	1-Pot traditional mud stove	hardwood	37	Tarai	00:24:36	12877.8	288.746
Cooking fire	1-Pot traditional mud stove (2 stoves side by side)	twigs (shorea robusta; ignited with plastic)	38	Tarai	00:23:47	3729.5	70.0006
Heating fire	Borse	dung (logs) & twigs	39	Tarai	00:19:59	5221.84	160.992
Cooking stoves	1-Pot traditional mud stove	dung	40	Tarai	00:14:50	3794.72	98.497
Cooking stoves	2-Pot traditional mud stove	dung & hardwood	41	Tarai	00:12:43	32235.5	1217.04
Groundwater pump	Diesel groundwater pump (4.6 kVA)	diesel	42	Tarai	00:09:58	4141.56	150.891
Groundwater pump	Diesel groundwater pump (5 kVA)	diesel	43	Tarai	00:15:12	1362.44	139.639
Open burning	Crop residue	rice, wheat, mustard, lentil, & weed grass (coburned)	44	Tarai	00:13:06	2558.07	188.47
Garbage burning	Mixed waste (dry conditions)	household waste; cardboard and chip bags	49	Tarai	00:10:53	1859.5	131.482
1) Servicing included changing oil, cleaning air filter, spark plug and carbureter

## Sheet: Table S2
Table S2: Descriptions and photographs of cooking stoves and fires
Stove Type	Description	Photograph
Traditional mud stove (1 or 2 pot)	A mud stove is a traditional cook stove commonly used in rural villages in Nepal. It is typically built from mud, but may include stone and dung. Depending on the design, it can allow for one, two, or three pots to be used for cooking at a time. This stove type is typically fueled by hardwood, twigs and/or dung.
Chimney stove	A chimney stove is a modification of a traditional mud stove that includes a chimney to exhaust smoke. It is made of stone, mud, iron rod, and/or other available local materials. Hardwood and twigs are used to fuel this stove.
Rocket stove	The rocket stove is made of metal and is fueled by hardwood. A natural draught is created inside the stove by thermal gradients. In some stoves, the air vent can be adjusted from the main door to control the draught.
Forced-draught stove	The forced-draught stove is also typically made of metal and is fueled with hardwood or charcoal. An electrical fan is connected to the stove to create a draught inside the stove. Some stoves may have variable frequency drive that control the draft.	Photo not available.
Biobriquette stove	Biobriquette stoves are designed for the combustion of either carbonized or non-carbonized compressed biomasses (charcoal, sawdust, rice husk, paper etc.). This stove type is manufactured from either mud or metal. This kind of a stove has two compartments separated by a grid (made from iron) and aeration is conducted through the natural draught. Some stoves also have an air flow control mechanism…
Forced-draught stove w/ charger	This is a special type of metallic stove and fired with hardwood or biobriquettes that also includes an electrical fan to create draught inside the stove. This stove also generates electricity that is sufficient to charge small electrical devices, such as mobile phone.
Bhuse chulo	Bhuse chulo is an insulated vertical combustion chamber that is made of metal. Powdered fuels (e.g., sawdust, rice husks) are fed into the combustion chamber and co-burned with hard wood or twigs. Many rural households maintain this stove for secondary usage while some have adopted it as primary stove.
3-Stone open cooking fire	A 3-stone cooking fire heats a cooking vessel atop of three stones upon which solid fuels are burned. In the case of wood (shown), long sticks are pushed slowly into the fire as they are consumed. This style of cooking is common outdoors, but rarely used indoors.

## Sheet: Table S3
Table S3: EFs for particle-phase species, including PM2.5, OC, EC, 8 inorganic ions, 12 metals (for 28 of 41 samples), and 68 organic species for each source sample collected in this study. Errors were propagated from analytical uncertainties of the measurements.
Source Category		Forced draft zig-zag kiln		Forced draft zig-zag kiln		Forced draft zig-zag kiln		Clamp kiln		Clamp kiln		Clamp kiln		Garbage burning		Garbage burning		Garbage burning		Garbage burning		Garbage burning		GenSet		GenSet		Groundwater pumps		Groundwater pumps		Motorcycles		Motorcycles		Cooking stoves		Cooking stoves		Cooking stoves		Cooking stoves		Cooking stoves		Cooking stoves		Cooking stoves
Fire #		35a		35b		35c		36a		36b		36c		49		14a		14b		15		16		1		2		42		43		3		8		17		18		19		20		21		22		23
Emission Source		Forced-draught zig-zag kiln - Sample 1		Forced-draught zig-zag kiln - Sample 2		Forced-draught zig-zag kiln - Sample 3		Clamp kiln - Sample 1		Clamp kiln - Sample 2		Clamp kiln - Sample 3		Mixed waste		Mixed waste - Sample 1		Mixed waste - Sample 2		Foil wrappers		Plastic waste		Diesel generator		Gasoline generator		Diesel pump		Diesel pump		Motorcycle - before servicing		Motorcycles - after servicing		1-pot traditional mud stove; hardwood		1-pot traditional mud stove; hardwood + dung		1-pot traditional mud stove; dung + twigs		1-pot traditional mud stove; dung		Chimney stove; hardwood		Chimney stove; hardwood + dung		Chimney stove; dung + twigs
Modified combustion efficiency (MCE)		0.9927		0.9948		0.9932		0.9482		0.9527		0.9537		0.9795		0.8891		0.9257		0.9725		0.9512		0.9797		0.3895		0.986		0.9964		0.603		0.5816		0.9734		0.9759		0.9436		0.9399		0.9749		0.9626		0.953
Fuel-based emission factor (EF)		EF	Unc	EF	Unc	EF	Unc	EF	Unc	EF	Unc	EF	Unc	EF	Unc	EF	Unc	EF	Unc	EF	Unc	EF	Unc	EF	Unc	EF	Unc	EF	Unc	EF	Unc	EF	Unc	EF	Unc	EF	Unc	EF	Unc	EF	Unc	EF	Unc	EF	Unc	EF	Unc	EF	Unc
PM2.5 (g kg-1)		19.06#	2.87777	11.75#	1.77673	14.52#	2.23342	8.0152	1.21924	10.5425	1.93255	13.4097	2.27993	7.36733	1.22173	124.837	22.5872	82.4705	12.6205	50.4158	8.94124	83.6576	12.7275	9.17261	1.50522	0.76604	1.8	8.72045	1.3461	5.51163	1.00131	8.80868	1.33354	0.714227	0.45	4.8918	0.904555	4.38427	0.661561	13.5291	2.03931	19.6963	2.97081	3.0119	0.467833	6.87669	1.03774	13.5498	2.04267
EC (g kg-1)		<0.01	NA	<0.01	NA	<0.01	NA	<0.02	NA	<0.1	NA	<0.1	NA	<0.04	NA	1.55561	0.162464	3.40737	0.342362	5.71177	0.578098	10.3119	1.04081	0.57933	0.0733729	<0.06	NA	0.177564	0.0270815	0.259799	0.0589999	0.393303	0.0413425	0.311181	0.0325518	0.799006	0.0832644	0.331476	0.0333721	0.605469	0.0610268	0.426053	0.044297	0.660306	0.0667309	0.597498	0.0600177	0.657855	0.0661753
OC (g kg-1)*		1.11666	0.173336	1.2596	0.179677	0.632902	0.0841019	4.68417	0.724154	7.26102	1.41574	8.36821	1.51926	8.41622	1.17333	73.9478	9.6558	48.29	6.24746	36.5347	4.70272	49.8555	6.5972	7.31318	1.19409	0.903524	0.587362	6.53947	0.899288	4.35684	0.749645	7.20729	0.870616	0.0207516	0.082501	2.46337	0.309918	1.69608	0.207051	6.88872	0.832237	8.48446	0.96081	1.55969	0.200624	2.00399	0.246821	6.63934	0.801836
Water-soluble OC fraction		0.102708	0.0324695	NM		0.0198409	0.00674183	0.0661358	0.0171647	0.0389716	0.0151446	0.0459013	0.0167539	NM		0.305909	0.0531276	0.174016	0.0304597	0.157263	0.0280722	0.0880756	0.0198191	0.09392	0.0245003	0.274713	0.0841023	0.0694561	0.0183027	0.121898	0.030896	0.0347485	0.00946742	0.131856	0.0520064	0.397673	0.0745651	0.329583	0.059444	0.260852	0.0459876	0.265168	0.0472053	0.43331	0.083089	0.251724	0.0472838	0.268893	0.0472589
Water-insoluble OC fraction		0.897292	0.283664	NM		0.980159	0.333053	0.933864	0.242372	0.961028	0.373462	0.954099	0.348244	NM		0.694091	0.120544	0.825984	0.14458	0.842737	0.150432	0.911924	0.205204	0.90608	0.236364	0.725287	0.222043	0.930544	0.245212	0.878102	0.222562	0.965252	0.262988	0.868144	0.34241	0.602327	0.112938	0.670417	0.120917	0.739148	0.13031	0.734832	0.130815	0.56669	0.108665	0.748276	0.140556	0.731107	0.128495
Water-soluble ions (g kg-1)
	Sodium	ND	NA	ND	NA	ND	NA	0.0311769	0.0296741	ND	NA	0.204757	0.169502	ND	NA	0.0354937	0.0554443	ND	NA	ND	NA	ND	NA	ND	NA	ND	NA	ND	NA	ND	NA	ND	NA	ND	NA	ND	NA	0.0060492	0.00733882	ND	NA	0.0206574	0.0229711	ND	NA	0.0337154	0.0113018	ND	NA
	Ammonium	0.0810547	0.0207951	0.0333531	0.0127256	0.0252959	0.0037758	0.992239	0.10246	1.85634	0.24289	2.39963	0.279157	0.0669817	0.0660768	0.836629	0.095986	1.06674	0.117923	0.101957	0.0616423	0.34752	0.218829	0.0535097	0.0700711	0.0812849	0.077619	0.025289	0.0372354	0.0136944	0.0475145	0.0165264	0.0159077	0.0193274	0.0125477	0.0906212	0.0179812	0.350843	0.0356686	0.540298	0.055433	1.39017	0.1405	0.0663213	0.0141759	0.933386	0.0938477	0.834126	0.0842555
	Potassium	ND	NA	ND	NA	0.00101929	0.00211704	0.0219913	0.0188969	ND	NA	0.0638183	0.107039	0.0275693	0.050038	0.0398184	0.0354687	0.0500716	0.0378758	ND	NA	ND	NA	ND	NA	0.0167301	0.0586654	ND	NA	ND	NA	ND	NA	ND	NA	0.0280599	0.0121159	0.0909878	0.0102838	0.416024	0.0427186	0.378168	0.0407328	0.0116793	0.00956686	0.319379	0.0327604	0.252576	0.02677
	Calcium	ND	NA	ND	NA	ND	NA	ND	NA	ND	NA	ND	NA	ND	NA	ND	NA	ND	NA	ND	NA	ND	NA	ND	NA	ND	NA	ND	NA	ND	NA	ND	NA	ND	NA	ND	NA	ND	NA	ND	NA	ND	NA	ND	NA	ND	NA	ND	NA
	Fluoride	0.00281355	0.00240234	0.00177617	0.00154237	0.000618505	0.000353144	ND	NA	ND	NA	ND	NA	0.0165296	0.0083786	0.177374	0.0186581	0.0419703	0.00745755	ND	NA	ND	NA	ND	NA	ND	NA	ND	NA	ND	NA	ND	NA	ND	NA	ND	NA	ND	NA	0.00422516	0.00154765	0.0102978	0.00260348	ND	NA	ND	NA	0.00491383	0.00147769
	Chloride	0.0180263	0.00413324	0.0103352	0.00260255	0.00192075	0.000575062	0.473227	0.0475661	0.619258	0.0689014	0.716941	0.0767457	0.0878167	0.0155273	1.33366	0.133671	1.80526	0.180782	0.166419	0.0204213	0.847027	0.0945723	ND	NA	ND	NA	ND	NA	ND	NA	ND	NA	ND	NA	0.121111	0.01248	0.659858	0.0659966	1.31672	0.131692	2.92465	0.292489	0.0775346	0.00812563	2.17553	0.21756	1.76653	0.176667
	Nitrate	ND	NA	0.029624	0.00752452	0.00503138	0.00164832	0.0678084	0.0154803	0.305465	0.0926611	0.322451	0.0856044	0.112136	0.038741	0.0515749	0.0266384	ND	NA	ND	NA	0.427153	0.129083	ND	NA	ND	NA	ND	NA	ND	NA	ND	NA	ND	NA	0.0210883	0.00897342	0.0205564	0.00401779	0.0327356	0.00747638	0.055484	0.0121375	0.0184155	0.00727667	0.0173677	0.00533716	0.0316872	0.00704442
	Sulfate	6.14115	0.614781	3.28858	0.329371	5.16101	0.516118	1.36714	0.141623	2.78827	0.362959	3.56306	0.413909	0.0619698	0.0986935	0.111623	0.0703099	ND	NA	ND	NA	0.165478	0.323976	ND	NA	ND	NA	ND	NA	ND	NA	ND	NA	ND	NA	0.0400459	0.0235112	0.0855911	0.0125434	0.152286	0.0234665	0.211027	0.0356023	ND	NA	0.109844	0.0173306	0.172656	0.0240286
Metals (mg kg-1)
	Ni	BFL	NA	BFL	NA	0.107767	0.0582277	BFL	NA	BFL	NA	BFL	NA	BFL	NA	BFL	NA	BFL	NA	BFL	NA	BFL	NA	BFL	NA	BFL	NA	BFL	NA	BFL	NA	BFL	NA	BFL	NA	NM		NM		BFL	NA	NM		NM		NM		BFL	NA
	Cu	BFL	NA	BFL	NA	BFL	NA	BFL	NA	BFL	NA	BFL	NA	BFL	NA	5.23882	1.06126	2.81929	1.01981	1.91627	1.22495	BFL	NA	BFL	NA	2.43187	1.59366	BFL	NA	BFL	NA	BFL	NA	BFL	NA	NM		NM		0.278621	0.243016	NM		NM		NM		0.307078	0.228283
	As	BFL	NA	0.120819	0.115209	0.0652927	0.0270964	BFL	NA	1.80114	1.30828	BFL	NA	BFL	NA	BFL	NA	1.0623	0.462469	BFL	NA	BFL	NA	BFL	NA	BFL	NA	BFL	NA	BFL	NA	BFL	NA	BFL	NA	NM		NM		0.124106	0.111461	NM		NM		NM		0.170604	0.105493
	Se	1.02384	0.403144	0.650781	0.258667	0.816483	0.102215	BFL	NA	BFL	NA	BFL	NA	BFL	NA	BFL	NA	1.46432	0.976775	BFL	NA	BFL	NA	BFL	NA	BFL	NA	BFL	NA	BFL	NA	BFL	NA	BFL	NA	NM		NM		BFL	NA	NM		NM		NM		BFL	NA
	Cd	BFL	NA	0.00631275	0.00540976	0.0031843	0.00126485	0.013106	0.0097457	BFL	NA	BFL	NA	0.247877	0.0383289	0.0643246	0.0205394	0.05128	0.0215809	0.0379611	0.0262572	BFL	NA	BFL	NA	0.0441316	0.034102	BFL	NA	BFL	NA	BFL	NA	0.00737248	0.00548223	NM		NM		0.116172	0.0128412	NM		NM		NM		0.126253	0.0136409
	Sb	BFL	NA	BFL	NA	BFL	NA	BFL	NA	BFL	NA	BFL	NA	4.63611	1.4116	3.26739	0.967867	6.66365	1.3565	12.9507	2.15243	0.618509	3.14875	BFL	NA	BFL	NA	BFL	NA	BFL	NA	BFL	NA	BFL	NA	NM		NM		BFL	NA	NM		NM		NM		0.0658194	0.169165
	Pb	0.296679	0.205604	0.505199	0.141973	0.423604	0.0531094	0.375245	0.237911	BFL	NA	BFL	NA	8.24667	1.11	BFL	NA	2.4937	0.576098	BFL	NA	13.5713	2.66503	BFL	NA	BFL	NA	BFL	NA	BFL	NA	BFL	NA	BFL	NA	NM		NM		0.408879	0.134084	NM		NM		NM		0.286366	0.12231
Organic species (mg kg-1)
	Phenanthrene	0.0179939	0.00791684	0.0288571	0.00825227	<0.002	NA	0.0390616	0.0165225	0.0547297	0.0572481	0.0462471	0.0520891	0.178709	0.0516057	7.05985	1.55487	6.89214	1.50985	2.17739	0.481095	5.2928	1.16241	0.089315	0.0330664	0.0857107	0.0398476	0.444861	0.101742	2.9303	0.641322	0.0713127	0.0190001	0.0305413	0.00885776	0.0558122	0.0137963	0.0443453	0.0109115	0.495805	0.110829	0.0126827	0.00285282	0.0560568	0.0133809	0.0548831	0.0133104	0.230804	0.0541376
	Anthracene	<0.002	NA	<0.002	NA	<0.001	NA	0.031305	0.00911869	<0.02	NA	<0.02	NA	0.0448905	0.0166105	1.3145	0.295741	1.64143	0.361392	0.359721	0.0825446	0.782511	0.175979	0.0485203	0.0153663	<0.01	NA	0.154756	0.0358739	0.7956	0.174588	0.0492421	0.0117439	0.00407798	0.00242819	0.015921	0.00431173	0.0158955	0.00401959	0.143935	0.0327182	0.012624	0.00277603	0.012622	0.00344809	0.0362887	0.00831898	0.0494252	0.0131393
	Fluoranthene	0.0474834	0.0106725	0.0378294	0.00847424	<0.001	NA	0.52148	0.113989	0.406514	0.0912751	0.483359	0.107455	1.08944	0.238221	9.45033	2.06259	17.1839	3.74663	9.33579	2.0357	12.5453	2.73579	0.207408	0.0463561	0.0393618	0.0139884	2.19176	0.4782	4.86958	1.06184	0.622788	0.135954	0.131444	0.0287974	1.05057	0.229081	1.38938	0.302894	3.72715	0.812664	0.0781354	0.0170399	0.583903	0.127354	0.694336	0.151429	4.04753	0.882466
	Pyrene	0.0132591	0.00334606	0.0161258	0.00375498	<0.0004	NA	0.835096	0.182222	0.470518	0.104102	0.627326	0.137922	1.28964	0.281597	10.7438	2.34362	20.4298	4.45366	12.0626	2.6297	13.6804	2.98274	0.638649	0.139668	0.0770722	0.018948	3.04281	0.663527	2.88932	0.630118	1.02386	0.223294	0.323333	0.0705549	1.23693	0.269666	1.81746	0.396169	4.60693	1.00431	0.045774	0.00998426	0.371492	0.0810361	1.11522	0.243128	3.8657	0.842749
	Methylfluoranthene	<0.01	NA	<0.01	NA	<0.002	NA	1.5576	0.340049	0.825455	0.197207	1.52726	0.340946	0.498887	0.117798	<0.19	NA	<0.11	NA	<0.07	NA	<0.11	NA	<0.04	NA	<0.05	NA	0.557466	0.12652	0.380598	0.091698	<0.01	NA	<0.01	NA	<0.01	NA	0.638531	0.139311	1.75941	0.38431	0.0364854	0.00798817	0.347023	0.0759285	0.454017	0.0992182	1.39501	0.304986
	9-Methylanthracene	<0.01	NA	<0.01	NA	<0.003	NA	0.0920544	0.032324	0.209993	0.113046	0.13251	0.09878	0.477783	0.119193	<0.25	NA	0.516953	0.179274	0.166806	0.100311	<0.15	NA	0.278425	0.0769741	0.0712758	0.0652284	0.202545	0.0631561	0.32081	0.0859685	0.0254106	0.0191418	0.0158002	0.0105961	0.0235032	0.0117141	0.0152044	0.00881736	0.0718628	0.0363451	<0.001	NA	0.0140321	0.00910717	<0.01	NA	0.0290361	0.0314299
	Benzo(ghi)fluoranthene	<0.01	NA	<0.01	NA	<0.002	NA	0.964711	0.210978	0.628329	0.154348	0.783152	0.182668	1.5994	0.350863	5.57621	1.22734	16.9767	3.70122	11.1588	2.43286	18.0847	3.94277	19.1633	4.17668	0.17177	0.0574984	3.77144	0.822554	0.777959	0.173018	2.19513	0.478585	1.57847	0.344088	2.13029	0.464342	1.91716	0.417873	3.5039	0.763991	0.0547694	0.0119556	1.16161	0.253236	2.33092	0.508052	3.60087	0.785077
	Cyclopenta(cd)pyrene	<0.01	NA	<0.005	NA	<0.002	NA	0.662905	0.145036	0.3639	0.0947763	0.585819	0.136198	0.525266	0.118123	2.59643	0.579511	8.93396	1.94837	3.49322	0.762775	8.12306	1.77192	1.25888	0.275395	<0.03	NA	0.693841	0.15291	<0.03	NA	1.90828	0.416001	0.885881	0.193139	1.62061	0.353244	2.00494	0.436986	4.78309	1.04258	0.0178891	0.00392938	0.378537	0.0826126	1.84738	0.402654	1.98605	0.433125
	Benz(a)anthracene	<0.01	NA	<0.01	NA	<0.002	NA	2.98635	0.651032	1.41683	0.314759	2.4075	0.527654	0.950291	0.20992	3.05605	0.682056	8.68093	1.89375	4.55194	0.993606	10.4387	2.27672	5.39618	1.1764	<0.04	NA	2.03835	0.445047	0.219036	0.0561259	0.293728	0.0649232	0.109354	0.0245558	1.32687	0.289252	2.22604	0.485179	4.21939	0.919798	0.0486726	0.0106235	0.825168	0.179912	2.01962	0.4402	2.29341	0.500167
	Chrysene	<0.01	NA	<0.006	NA	<0.002	NA	2.57922	0.562268	2.72644	0.596402	3.05919	0.668365	1.65105	0.360975	4.64386	1.01954	10.5456	2.29938	4.36141	0.951668	15.2196	3.31782	9.90464	2.15879	0.0813858	0.0359602	1.75255	0.38261	0.230929	0.0560632	0.326624	0.0717587	0.142697	0.0314913	1.29177	0.281583	1.56576	0.341274	2.91638	0.635817	0.0622107	0.013567	0.57181	0.124695	1.50281	0.327561	2.21765	0.483565
	1-Methylchrysene	<0.01	NA	<0.004	NA	<0.002	NA	1.23028	0.268399	1.40083	0.309169	1.79077	0.392823	<0.03	NA	0.50133	0.160348	0.788225	0.18394	0.15293	0.0552612	<0.07	NA	0.442805	0.0990562	<0.03	NA	<0.02	NA	<0.02	NA	<0.01	NA	0.00558123	0.00487862	0.133773	0.0295753	0.195401	0.0427605	0.884127	0.19331	0.0106172	0.00235909	0.0594686	0.0135772	0.289625	0.063275	0.282942	0.063351
	Retene	0.0134101	0.0198777	0.0479985	0.0179232	<0.005	NA	0.44284	0.104623	0.572243	0.206598	0.840589	0.237107	0.154386	0.0983513	36.926	8.05761	4.00833	0.90141	1.00367	0.264654	2.83397	0.660513	<0.08	NA	<0.10	NA	<0.07	NA	0.142964	0.0855756	0.0120181	0.0293138	<0.02	NA	<0.02	NA	0.0111751	0.0132457	0.230191	0.0724434	<0.001	NA	0.0987995	0.025505	0.119778	0.03003	<0.05	NA
	Benzo(b)fluoranthene	<0.02	NA	<0.01	NA	<0.004	NA	1.26672	0.277979	0.94472	0.244836	1.06822	0.262412	1.25675	0.28381	2.64728	0.659293	8.53362	1.86843	4.61311	1.01252	15.8134	3.45158	8.36673	1.8245	0.0265894	0.0814011	1.57725	0.348594	<0.06	NA	0.369141	0.0838097	0.245398	0.0550038	1.37738	0.300496	1.58058	0.344638	4.09691	0.89389	0.027544	0.00613152	0.648651	0.141797	1.28356	0.279999	1.16852	0.257711
	Benzo(k)fluoranthene	<0.01	NA	<0.01	NA	<0.004	NA	0.837631	0.185015	0.757987	0.205715	1.03521	0.251902	0.820803	0.191658	1.85675	0.500908	8.04515	1.76118	4.19118	0.920151	6.59883	1.4487	7.57582	1.65207	0.00768363	0.0751509	1.32122	0.292894	<0.06	NA	0.312413	0.0714723	0.182917	0.0415996	1.34106	0.292545	0.701644	0.153226	0.913333	0.202821	0.020112	0.00453298	0.451354	0.0988949	0.497546	0.108999	1.22512	0.269493
	Benzo(j)fluoranthene	<0.01	NA	<0.01	NA	<0.002	NA	0.227952	0.0534465	<0.08	NA	0.0348876	0.073842	0.316131	0.0823454	0.436976	0.215712	3.22122	0.710372	0.799712	0.188845	6.07419	1.32876	0.378186	0.0902751	<0.05	NA	0.265239	0.0676392	<0.04	NA	0.0626346	0.0197313	0.00921143	0.00804619	0.658023	0.143647	0.521258	0.113783	1.17151	0.256595	0.00711104	0.00172498	0.232768	0.0511673	0.55001	0.120091	0.437495	0.0983087
	Benzo(e)pyrene	<0.01	NA	<0.01	NA	<0.002	NA	1.54604	0.337527	1.2329	0.280468	1.5654	0.348988	0.874949	0.195951	1.93382	0.463783	7.57137	1.6537	4.37842	0.95702	5.40186	1.18284	7.13407	1.55527	0.0738033	0.0518182	1.66591	0.364771	<0.04	NA	0.505229	0.11103	0.488494	0.106749	0.658023	0.143647	0.680676	0.148486	1.48436	0.324513	0.0159553	0.0035589	0.378866	0.0828409	0.627507	0.136954	0.705759	0.155668
	Benzo(a)pyrene	<0.01	NA	<0.01	NA	<0.002	NA	1.0691	0.233424	0.686065	0.160013	1.06249	0.237348	0.845238	0.186969	2.28062	0.51564	7.64614	1.66821	3.40758	0.74445	5.17259	1.13024	1.86131	0.406501	<0.03	NA	0.870581	0.191365	<0.03	NA	0.467449	0.102378	0.342198	0.0747847	1.38094	0.301025	1.47349	0.321172	2.63165	0.573841	0.0260859	0.00571059	0.734445	0.160139	1.09134	0.237907	1.33143	0.290675
	Perylene	<0.01	NA	<0.01	NA	<0.002	NA	0.165302	0.0391521	0.586429	0.142281	0.226278	0.0754741	0.0577561	0.037269	0.380963	0.171933	1.38017	0.312402	0.620374	0.146555	1.57534	0.354646	0.342665	0.0799866	<0.04	NA	0.0295528	0.0280669	<0.03	NA	0.294985	0.0652386	0.0736275	0.0171532	0.378439	0.0827246	0.258683	0.0565948	0.821999	0.180245	0.00508007	0.00125416	0.23081	0.0505708	0.393615	0.0859713	0.259851	0.0596157
	Indeno(1,2,3-cd)pyrene	<0.004	NA	<0.01	NA	<0.001	NA	0.356731	0.0783354	0.403985	0.0963213	0.546021	0.124241	0.914749	0.200566	1.64303	0.370238	5.33576	1.1641	3.29463	0.718917	8.31225	1.81246	4.84175	1.05539	0.12496	0.0362598	1.89577	0.413527	<0.02	NA	0.681261	0.148639	0.492908	0.107493	1.02735	0.223941	0.979391	0.213476	1.61914	0.3531	0.0219183	0.00479115	0.542446	0.118268	0.610738	0.133154	1.07301	0.234146
	Benzo(GHI)perylene	<0.01	NA	<0.01	NA	<0.003	NA	0.537604	0.119217	0.383365	0.122627	0.571648	0.149166	0.742869	0.169557	1.95725	0.478212	7.03928	1.53895	4.72994	1.03406	8.14088	1.77884	5.03205	1.09748	0.740965	0.170602	1.77785	0.389454	<0.04	NA	1.97436	0.430597	1.71323	0.373491	1.25404	0.273466	0.842199	0.18369	2.6898	0.58692	0.015119	0.00340193	0.829152	0.180863	0.57604	0.125805	0.677951	0.150155
	Dibenz(ah)anthracene	<0.02	NA	<0.01	NA	<0.004	NA	0.182531	0.0524365	0.183105	0.14493	0.20472	0.134919	0.304237	0.102509	0.0576013	0.33576	1.01321	0.289986	0.392545	0.152314	2.74676	0.630537	0.337753	0.097434	<0.09	NA	0.289545	0.0876847	<0.07	NA	<0.02	NA	0.0076602	0.01361	0.190783	0.043938	0.112416	0.0268621	0.417568	0.101176	0.00298773	0.00146556	0.126165	0.0298293	0.172836	0.0397063	0.118945	0.0489284
	Picene	<0.01	NA	<0.01	NA	<0.003	NA	0.51455	0.113966	0.436647	0.12613	0.542704	0.140403	<0.05	NA	0.101696	0.200576	1.88333	0.425382	0.404183	0.115609	4.76633	1.04544	0.335334	0.082339	<0.09	NA	<0.04	NA	<0.04	NA	<0.02	NA	<0.01	NA	0.390443	0.0855122	0.264877	0.0580982	1.05261	0.23091	0.00757659	0.00182626	0.216847	0.0477574	0.493784	0.107876	0.324064	0.0748077
	Triphenylbenzene	ND	NA	ND	NA	ND	NA	ND	NA	ND	NA	ND	NA	0.37708	0.0390956	1.86509	0.424617	0.986283	0.225686	0.26677	0.0742014	0.54832	0.139744	ND	NA	ND	NA	ND	NA	ND	NA	ND	NA	ND	NA	ND	NA	ND	NA	ND	NA	ND	NA	ND	NA	ND	NA	ND	NA
	17a(H)-22,29,30-Trisnorhopane	<0.003	NA	<0.002	NA	<0.001	NA	6.46023	1.40799	5.32389	1.16058	7.36872	1.60613	<0.01	NA	0.943073	0.213977	0.59306	0.133483	<0.02	NA	<0.04	NA	0.956198	0.208706	<0.02	NA	0.927885	0.202516	0.15813	0.0364786	1.59774	0.348246	0.0739953	0.0163038	<0.002	NA	0.0268358	0.00616621	0.212291	0.0469272	0.00806003	0.00177201	<0.002	NA	<0.002	NA	<0.01	NA
	17b(H)-21a(H)-30-Norhopane	0.0370555	0.0145398	0.0131297	0.00886139	<0.003	NA	7.23156	1.58057	5.92216	1.3113	8.99062	1.97725	0.278208	0.0857726	3.34975	0.800548	1.37499	0.344145	<0.08	NA	<0.12	NA	2.10064	0.467638	<0.05	NA	1.58394	0.354989	0.738509	0.174662	5.07101	1.10845	0.157303	0.0369731	<0.01	NA	0.0070125	0.00746577	0.161353	0.0492283	<0.001	NA	0.0325787	0.0111998	0.0312457	0.0114877	<0.03	NA
	17a(H)-21b(H)-Hopane	0.0221861	0.0197221	0.0177195	0.0147178	0.0166504	0.00633366	7.90982	1.73114	6.18822	1.3848	9.80812	2.16751	0.223866	0.106179	7.17104	1.66988	2.60116	0.637707	<0.14	NA	0.977943	0.331038	1.75525	0.401299	0.0162435	0.0944485	1.48871	0.343012	0.930635	0.228249	6.06601	1.32727	0.265623	0.0623272	<0.02	NA	0.0139091	0.0129902	0.379447	0.103245	0.00774551	0.00241151	0.114716	0.0300346	0.0692423	0.022219	<0.04	NA
	22(S)-Homohopane	<0.003	NA	<0.002	NA	<0.001	NA	2.59949	0.566574	2.48777	0.5427	3.10978	0.678098	<0.01	NA	<0.06	NA	<0.03	NA	<0.02	NA	<0.03	NA	1.22835	0.267927	<0.01	NA	1.02391	0.223391	0.261461	0.0580964	2.9943	0.652605	0.172283	0.0376165	<0.02	NA	<0.002	NA	<0.01	NA	<0.0002	NA	<0.002	NA	<0.002	NA	<0.01	NA
	22(R)-Homohopane	<0.003	NA	<0.002	NA	<0.001	NA	2.40355	0.523874	2.08818	0.455708	2.69359	0.587444	<0.01	NA	<0.06	NA	<0.03	NA	<0.02	NA	<0.03	NA	1.15096	0.251074	<0.01	NA	0.978566	0.213518	0.169647	0.0386659	2.66095	0.579955	0.166382	0.0363328	<0.002	NA	<0.002	NA	<0.01	NA	<0.0002	NA	<0.002	NA	<0.002	NA	<0.01	NA
	22(S)-Bishomohopane	<0.003	NA	<0.002	NA	<0.001	NA	1.40485	0.306234	1.86087	0.406241	2.56543	0.55953	<0.01	NA	<0.06	NA	<0.03	NA	<0.02	NA	<0.03	NA	0.811846	0.177262	<0.01	NA	0.593164	0.12968	0.126438	0.0297887	2.30947	0.503354	0.163519	0.0357101	<0.002	NA	<0.002	NA	<0.01	NA	<0.0002	NA	<0.002	NA	<0.002	NA	<0.01	NA
	22(R)-Bishomohopane	<0.003	NA	<0.002	NA	<0.001	NA	1.52486	0.332385	1.68842	0.368725	2.20139	0.480258	<0.01	NA	<0.06	NA	<0.03	NA	<0.02	NA	<0.03	NA	0.739066	0.161431	<0.01	NA	0.660664	0.14435	0.188715	0.0426572	1.96647	0.428602	0.165918	0.0362319	<0.002	NA	<0.002	NA	<0.01	NA	<0.0002	NA	<0.002	NA	<0.002	NA	<0.01	NA
	22(S)-Trishomohopane	<0.003	NA	<0.002	NA	<0.001	NA	0.544656	0.118843	1.06041	0.23229	0.854832	0.187528	<0.01	NA	<0.06	NA	<0.03	NA	<0.02	NA	<0.03	NA	0.378715	0.0832313	<0.01	NA	<0.01	NA	<0.01	NA	1.3755	0.299813	<0.002	NA	<0.002	NA	<0.002	NA	<0.01	NA	<0.0002	NA	<0.002	NA	<0.002	NA	<0.01	NA
	22(R)-Trishomohopane	<0.003	NA	<0.002	NA	<0.001	NA	0.522674	0.114058	0.548376	0.121781	0.554209	0.122662	<0.01	NA	<0.06	NA	<0.03	NA	<0.02	NA	<0.03	NA	0.313341	0.0691262	<0.01	NA	<0.01	NA	<0.01	NA	1.08836	0.237238	<0.002	NA	<0.002	NA	<0.002	NA	<0.01	NA	<0.0002	NA	<0.002	NA	<0.002	NA	<0.01	NA
	abb-20(R)-C27-Cholestane	<0.004	NA	<0.003	NA	<0.001	NA	<0.01	NA	0.536648	0.122703	0.596405	0.134626	<0.02	NA	<0.07	NA	<0.04	NA	<0.03	NA	<0.04	NA	<0.01	NA	<0.02	NA	0.349532	0.078147	<0.01	NA	0.380376	0.0834089	<0.002	NA	<0.002	NA	<0.002	NA	<0.01	NA	<0.0002	NA	<0.001	NA	<0.003	NA	<0.01	NA
	abb-20(S)-C27-Cholestane	<0.001	NA	<0.001	NA	<0.0002	NA	<0.002	NA	<0.01	NA	<0.01	NA	<0.004	NA	<0.02	NA	<0.01	NA	<0.01	NA	<0.01	NA	<0.01	NA	<0.004	NA	0.487364	0.106478	<0.004	NA	0.574719	0.125348	<0.002	NA	<0.002	NA	<0.002	NA	<0.002	NA	<0.001	NA	<0.001	NA	<0.001	NA	<0.002	NA
	aaa-20(S)-C27-Cholestane	<0.01	NA	<0.01	NA	<0.003	NA	<0.02	NA	<0.1	NA	<0.09	NA	<0.05	NA	<0.23	NA	<0.13	NA	<0.09	NA	<0.14	NA	0.457466	0.109159	<0.06	NA	0.246845	0.0684901	<0.05	NA	0.783956	0.171722	<0.01	NA	<0.01	NA	<0.01	NA	<0.03	NA	<0.001	NA	<0.01	NA	<0.01	NA	<0.03	NA
	abb-20(R)-C28-Ergostane	<0.005	NA	<0.004	NA	<0.001	NA	<0.01	NA	0.0401135	NA	<0.04	NA	<0.02	NA	<0.10	NA	<0.05	NA	<0.04	NA	<0.06	NA	0.180402	0.0434009	<0.02	NA	0.380438	0.0847469	<0.02	NA	0.689799	0.150506	0.0441701	0.0103825	<0.004	NA	<0.003	NA	<0.01	NA	<0.001	NA	<0.003	NA	<0.004	NA	<0.01	NA
	abb-20(S)-C28-Ergostane	<0.005	NA	<0.004	NA	<0.001	NA	<0.01	NA	<0.04	NA	<0.04	NA	<0.02	NA	<0.10	NA	<0.05	NA	<0.04	NA	<0.06	NA	0.18403	0.0441184	<0.02	NA	0.407284	0.0904796	<0.02	NA	0.635411	0.138667	0.0291216	0.00744353	<0.004	NA	<0.003	NA	<0.01	NA	<0.001	NA	<0.003	NA	<0.004	NA	<0.01	NA
	abb-20(R)-C29-Sitostane	<0.01	NA	<0.01	NA	<0.002	NA	<0.01	NA	<0.06	NA	<0.05	NA	<0.03	NA	<0.14	NA	<0.08	NA	<0.05	NA	<0.08	NA	0.437741	0.0990954	<0.04	NA	1.06412	0.233323	0.136498	0.0410618	1.47229	0.321046	0.103884	0.0233404	<0.01	NA	0.0468258	0.0112039	0.303048	0.0686056	0.00824657	0.00187991	<0.005	NA	0.0603126	0.0141623	0.191756	0.0452776
	abb-20(S)-C29-Sitostane	<0.01	NA	<0.01	NA	<0.002	NA	<0.01	NA	<0.06	NA	<0.05	NA	<0.03	NA	<0.14	NA	<0.08	NA	<0.05	NA	<0.08	NA	0.301929	0.0710511	<0.04	NA	0.743044	0.163947	0.154024	0.0439081	0.872849	0.190515	0.0730038	0.016891	<0.01	NA	0.0552661	0.0129019	0.317476	0.0716379	0.0084517	0.0019227	<0.005	NA	0.0814971	0.0185275	0.183605	0.0436431
	Pristane	<0.45	NA	<0.33	NA	<0.11	NA	1.1365	1.05898	1.13961	4.01158	0.911056	3.65695	1.70116	2.33617	35.7607	13.7903	21.3225	7.93789	26.9668	7.64288	12.7845	6.88585	7.38071	2.7191	<2.31	NA	19.2468	4.94099	3.30672	2.2101	1.04205	0.789679	<0.37	NA	0.383973	NA	0.00231383	0.311435	2.06588	1.43687	0.0761552	0.0445169	0.923823	0.427206	0.733793	0.426448	<1.12	NA
	Norpristane	<0.16	NA	<0.12	NA	0.0105849	0.041414	0.056269	0.338284	0.338203	1.38503	0.152744	1.25823	0.0129787	0.76907	29.1559	7.67324	12.5451	3.56745	9.93869	2.68371	8.1686	2.86676	0.69555	0.67185	<0.82	NA	2.42291	0.867159	0.348048	0.680699	0.336485	0.266091	<0.13	NA	0.0516671	0.142077	<0.11	NA	0.946475	0.513831	0.0252577	0.0149245	0.307682	0.14209	0.225808	0.140955	1.14785	0.515859
	Phytane	<0.26	NA	0.02824	0.195003	<0.06	NA	0.211225	0.548154	0.463113	2.21394	0.0758948	2.00705	0.528824	1.25712	1.69882	5.36247	1.51246	3.03739	0.258331	1.99461	1.72407	3.20808	0.515316	1.03165	1.15026	1.41265	1.03805	1.02505	0.426772	1.08242	0.055542	0.391149	<0.21	NA	0.0319167	0.224888	0.0116503	0.173828	1.46256	0.817961	0.0343503	0.0232636	0.41949	0.218472	0.363503	0.226307	<0.64	NA
	Squalane	<0.48	NA	0.131914	0.372579	0.0425377	0.125882	7.92558	2.17235	10.6752	5.14007	14.7302	5.43153	3.61717	2.59843	37.4083	14.09	5.96757	5.98267	7.92835	4.42763	4.65641	6.16688	7.28047	2.70644	0.227487	2.54717	4.21164	2.1867	0.0336145	2.00435	0.288555	0.74889	0.228289	0.414151	0.0498496	0.424154	0.335658	0.349334	2.30862	1.49793	0.0924784	0.0473703	0.193562	0.354401	0.283978	0.390207	1.22439	1.31273
	Octadecane	<0.13	NA	<0.10	NA	0.00777173	0.0344244	<0.27	NA	0.768636	1.18579	<1.01	NA	<0.62	NA	29.2498	7.46109	12.5717	3.41685	14.8626	3.60371	8.19423	2.65498	0.593018	0.563676	<0.68	NA	2.36585	0.789675	0.42247	0.577721	0.28617	0.223663	0.00675754	0.110693	0.0619953	0.11966	<0.09	NA	0.820772	0.43618	0.0264054	0.0132194	0.231352	0.11626	0.160208	0.115262	1.15592	0.463846
	Nonadecane	<0.41	NA	<0.30	NA	<0.10	NA	1.18218	0.994082	1.23798	3.71406	1.01497	3.38536	1.83522	2.18354	36.025	13.3051	21.4863	7.67653	30.5312	8.21411	12.9484	6.54444	7.42896	2.62987	<2.11	NA	20.3409	5.11527	2.77257	2.0128	1.06075	0.742769	<0.33	NA	<0.35	NA	0.01112	0.287509	2.08825	1.35299	0.0764091	0.0420753	0.925347	0.407298	0.751831	0.405284	<1.03	NA
	Eicosane	<0.51	NA	<0.38	NA	<0.13	NA	5.96978	1.95193	11.6914	5.84809	11.5317	5.46956	4.69025	3.02413	54.9667	18.5072	37.2208	11.55	43.4193	11.3949	34.0711	11.2169	47.0921	11.0681	0.478486	2.82599	20.7542	5.45962	7.2185	3.06778	4.17318	1.38523	0.658822	0.503704	0.146379	0.474972	0.155235	0.37176	4.73859	2.01239	0.167059	0.0640646	1.79561	0.620182	1.84609	0.65521	0.428603	1.38809
	Heneicosane	<0.08	NA	0.0971599	0.0659996	0.0217284	0.0212925	15.0026	3.30076	24.0944	5.40203	29.8163	6.62663	3.7407	0.952112	57.3057	12.8538	39.4068	8.78257	49.0542	10.8074	26.6543	6.03921	135.661	29.6188	0.838403	0.475635	35.061	7.69497	11.6752	2.61749	5.67433	1.26168	0.485868	0.132986	0.1122	0.0761385	0.17027	0.0694356	3.22863	0.76777	0.105439	0.0248115	0.182099	0.0733797	0.501244	0.133199	1.85314	0.478924
	Docosane	<1.46	NA	<1.08	NA	<0.37	NA	18.3634	5.77442	27.4555	15.7108	36.3336	15.9894	6.38409	7.75478	55.9532	36.5058	38.8211	21.437	39.0734	16.3128	42.7029	22.8323	179.477	41.2162	<7.50	NA	35.2542	10.7639	12.681	7.52164	5.97339	2.94021	0.161506	1.26102	<1.25	NA	0.0588108	1.02333	4.0462	4.42874	0.30506	0.1545	3.21362	1.43881	4.9784	1.80509	<3.65	NA
	Tricosane	0.214087	0.689304	0.59111	0.555299	0.220085	0.190227	34.2321	8.04537	55.1031	14.9301	62.9997	16.2511	10.6346	4.52012	113.231	32.0205	55.6477	16.3943	53.3558	14.2235	36.7649	13.1426	178.087	39.7836	0.978438	3.52837	35.108	8.81381	19.203	5.73227	9.17468	2.52606	1.68703	0.756512	0.379278	0.607181	1.05064	0.56669	17.5009	4.74071	0.320565	0.101344	2.48964	0.829931	2.22462	0.814431	3.00722	2.00057
	Tetracosane	0.03308	1.36399	0.632389	1.0444	0.27746	0.35791	42.0371	10.0912	54.8715	18.0797	78.7188	21.7574	17.8811	8.12406	128.322	42.8886	74.0531	24.3952	60.7494	18.3173	72.3241	24.7372	141.18	32.2064	6.71103	7.42247	27.8835	8.58496	8.40716	6.15113	9.89661	3.23402	0.615581	1.1405	<1.14	NA	1.30737	0.998094	6.46042	4.13522	0.16139	0.119548	0.867126	1.00163	3.38522	1.37853	3.54382	3.63097
	Pentacosane	<1.93	NA	0.682991	1.51414	0.245987	0.513139	44.239	11.3026	52.7421	22.315	80.5154	25.7425	14.7298	10.563	134.682	54.8994	33.3572	25.1722	48.1524	20.2504	23.494	25.3601	97.9944	24.2757	<9.89	NA	15.7938	8.74151	4.82496	8.37098	5.50332	3.43473	0.82024	1.66627	<1.65	NA	1.17652	1.39906	8.5552	5.99831	0.28213	0.181361	1.72635	1.51473	4.56728	1.98346	4.29044	5.25897
	Hexacosane	<2.15	NA	0.484123	1.67852	0.156636	0.56721	33.4071	9.4972	45.9409	23.2348	62.0861	24.2206	11.9779	11.3962	158.807	63.0651	57.4231	30.7327	41.236	20.972	34.9028	29.3277	49.0547	15.2316	<11.03	NA	5.25743	8.50992	2.91866	9.21004	4.42673	3.66588	0.845979	1.86348	<1.83	NA	0.596098	1.51274	7.5112	6.51877	0.147787	0.186417	0.917463	1.60983	4.57063	2.15396	1.71519	5.66325
	Heptacosane	<2.31	NA	0.389624	1.78783	0.127743	0.604402	38.7755	10.6953	59.3296	26.1743	76.6818	27.436	15.9542	12.4802	217.564	74.9013	47.763	31.0504	50.3087	23.1915	25.101	30.1359	35.0598	13.2018	1.3536	12.3234	18.9381	10.4802	0.628423	9.70627	5.27489	3.96781	1.10981	2.00729	<1.97	NA	1.17144	1.65745	11.1094	7.28852	0.411591	0.226423	0.898609	1.71453	1.19264	1.87825	5.2198	6.3123
	Octacosane	<1.47	NA	1.14767	1.20688	0.359569	0.405547	41.3065	10.1973	69.2405	21.9027	82.6966	23.6321	3.75659	7.36836	148.504	49.5137	41.0597	21.13	40.7609	16.1011	66.2737	25.6504	28.7251	9.50246	1.3829	7.86708	2.72321	5.72335	<5.94	NA	0.528664	2.28317	0.274559	1.24777	0.506201	1.32585	0.391134	1.02825	14.2342	5.63816	0.111694	0.127733	0.12906	1.06189	3.09624	1.46017	3.45055	4.02996
	Nonacosane	<1.49	NA	1.01973	1.20864	0.288213	0.404051	38.2736	9.55817	68.1725	21.74	82.9094	23.6751	8.2447	7.83507	170.656	53.513	81.187	27.4447	75.2082	22.1382	36.3413	21.5266	16.4496	7.56432	2.60498	8.04911	1.43109	5.71242	<6.05	NA	3.14159	2.52845	0.433836	1.27459	<1.27	NA	2.79759	1.29941	23.566	7.24618	0.583085	0.194459	0.207774	1.08118	4.01799	1.60374	11.0191	4.96367
	Triacontane	<1.23	NA	0.713836	0.994229	0.216598	0.334159	25.4097	6.68985	59.5628	18.7542	53.7452	17.0141	5.72208	6.41966	125.411	41.9427	85.8156	26.3014	38.8233	14.3416	66.6545	23.4814	7.73896	5.56007	0.540954	6.5781	0.594491	4.70218	<4.98	NA	3.30231	2.18706	0.235094	1.04966	<1.05	NA	0.850723	0.908606	13.6962	5.04381	0.170473	0.115667	0.047239	0.889239	2.58291	1.23037	3.20624	3.42348
	Hentriacontane	0.0562353	1.06001	0.909899	0.852261	0.17072	0.275955	28.5792	7.07371	62.7136	17.99	54.9834	15.9965	2.64204	5.13764	106.339	35.0764	67.7875	21.1221	54.092	15.7701	38.4213	16.7128	5.69772	4.52003	1.92907	5.54323	<3.73	NA	<4.13	NA	3.83837	1.94864	0.0027151	0.858542	<0.87	NA	2.20782	0.940224	16.6723	5.10138	0.547782	0.16132	<0.71	NA	2.49491	1.06859	5.74201	3.18022
	Dotriacontane	<0.62	NA	0.535766	0.533199	0.0787196	0.170384	19.376	4.80624	39.8894	11.6101	37.1995	10.7554	4.40657	3.49935	95.2026	27.7923	63.8642	17.6448	50.7801	13.4378	46.7847	14.6062	2.94968	2.78337	1.27244	3.4658	<2.27	NA	<2.51	NA	0.676754	1.0295	0.204601	0.548493	<0.53	NA	0.286847	0.457701	5.50632	2.39897	0.0519027	0.0563085	0.01785	0.457761	0.981769	0.5965	1.31762	1.74702
	Tritriacontane	0.211846	0.653766	0.325569	0.495742	0.0589088	0.164034	17.5808	4.31862	30.9821	9.51574	30.7522	9.14427	3.40114	3.26243	161.759	40.1517	64.1643	17.1168	49.0312	12.6806	41.6902	13.1006	1.65612	2.56798	1.23819	3.3661	0.373959	2.36939	<2.53	NA	<0.93	NA	0.117064	0.527618	<0.53	NA	0.571208	0.468621	8.14008	2.71949	0.131773	0.0635287	<0.43	NA	0.813382	0.551615	2.012	1.75162
	Tetratriacontane	<0.32	NA	0.474443	0.274024	0.117579	0.0883853	12.1706	2.82288	20.7759	5.59289	20.9841	5.49696	5.79512	2.10909	162.483	36.8917	62.8735	14.6664	49.6472	11.4227	54.1135	12.9072	2.27878	1.40154	2.66417	1.83636	<1.17	NA	<1.30	NA	12.8491	2.9065	0.418093	0.290156	<0.27	NA	0.41487	0.244111	3.75256	1.26727	0.0603978	0.030346	<0.22	NA	0.849651	0.326637	1.88242	0.955932
	Pentatriacontane	<0.33	NA	<0.25	NA	<0.08	NA	7.65556	1.86257	13.6871	4.28259	10.6828	3.62218	4.60891	1.9466	143.548	32.6078	49.0598	11.6669	37.5474	8.78813	31.1607	8.18832	1.86674	1.38643	1.98257	1.81522	<1.22	NA	<1.35	NA	10.935	2.47888	<0.27	NA	<0.29	NA	0.287056	0.236429	3.49369	1.22485	0.0415249	0.0287814	<0.23	NA	0.393331	0.274921	1.33168	0.911329
	Levoglucosan	3.21029	1.0375	0.239413	0.500793	1.10299	0.313125	0.849086	1.40069	2.27482	5.64354	<5	NA	958.854	209.501	10209.7	2227.33	2095.71	458.013	96.2639	22.3424	694.555	152.841	3.5847	2.77443	8.38256	4.10798	11.623	3.77604	16.4215	4.80567	4.26056	1.4565	2.4663	0.818948	79.9176	17.5175	166.342	36.3265	578.301	126.333	11.4823	2.51144	1102.01	240.252	193.418	42.2379	446.523	97.5968
	Cholesterol	<0.47	NA	<0.36	NA	<0.24	NA	<1.04	1.07006	12.2	5.39	11.62	4.99	1.58112	2.34873	<10.4	NA	8.99	6.27	<3.82	NA	<5.59	NA	<1.80	NA	<2.41	NA	<1.72	NA	<1.90	NA	<0.70	NA	<0.38	NA	<0.40	NA	2.06	0.31	14.18	3.69	0.22	0.0692549	<0.36	NA	1.81752	0.586849	6.39	2.06
	Stigmasterol	<0.08	NA	<0.06	NA	<0.02	NA	<0.16	NA	<0.39	0.714155	<0.60	NA	1.24252	0.529739	11.1112	3.29681	6.69	1.94	2.55732	0.94447	4.60275	1.58505	1.55252	0.52317	1.6522	0.626417	<0.28	NA	<0.32	NA	<0.12	NA	<0.06	NA	0.53	0.15	1.3848	0.32149	10.4697	2.35311	0.370661	0.0828581	0.56	0.15	1.22405	0.290495	4.37365	1.03021
	b-Sitosterol	<0.43	NA	<0.32	NA	<0.11	NA	<0.89	NA	<3.62	NA	<3.31	NA	4.51201	2.62603	60.8052	18.3271	37.2887	10.8888	15.6123	5.55356	34.4528	10.5429	4.1076	2.20312	2.3984	2.56009	<0.158	NA	2.17567	2.05183	0.83	0.572414	0.55	0.423303	7.49	1.79	5.07114	1.2323	23.0661	5.52245	0.593399	0.144545	4.85039	1.19364	2.02185	0.637906	18.1573	4.44208
	Campesterol	<0.07	NA	<0.05	NA	<0.02	NA	<0.14	NA	<0.55	NA	<0.50	NA	1.2234	0.429179	11.5638	2.96506	7.24	1.81	2.8537	0.8363	6.96938	1.7781	<0.25	NA	<0.34	NA	<0.24	NA	<0.27	NA	<0.10	NA	<0.05	NA	1.77299	0.39592	2.37439	0.523563	8.92735	1.97055	0.300187	0.0661363	1.97594	0.437519	2.6491	0.584329	7.79025	1.72174
	Cholestanol / Coprostanol	<0.08	NA	<0.06	NA	<0.02	NA	<0.16	NA	<0.64	NA	<0.59	NA	<0.36	NA	<1.55	NA	<0.87	NA	<0.58	NA	<0.91	NA	<0.29	NA	<0.39	NA	<0.28	NA	<0.31	NA	<0.11	NA	<0.06	NA	<0.07	NA	0.822809	0.18641	4.50024	1.00185	0.282314	0.0618274	<0.05	NA	0.749098	0.173267	3.16169	0.715259
	Stigmastanol	<0.05	NA	<0.04	NA	<0.01	NA	<0.11	NA	<0.44	NA	<0.40	NA	0.282085	2.1061	<1.06	1.80681	<0.60	NA	<0.40	NA	<0.63	NA	<0.20	NA	<0.27	NA	<0.19	0.20368	<0.21	NA	<0.08	NA	<0.04	NA	0.35	0.09	5.08832	0.254416	14.6666	0.733329	0.706487	0.154571	<0.04	NA	2.22887	0.492545	17.1892	3.76566
Symbols and abbreviations
<	indicates below the method dection limit
NA	not applicable
NM	not measured
BFL	below the field blank level
ND	Not detected
#	This value is expected to include hygroscopic water, see section 3.1 for the estimated value that excludes water.
*	corrected for artifacts
[truncated: 34 more columns]
